# Supplementary material
Source: Springer Nature journal article supplement (https://www.springermedizin.de/resource/supplementary/12958_2004_145_MOESM6_ESM.pdf/9567240)

A

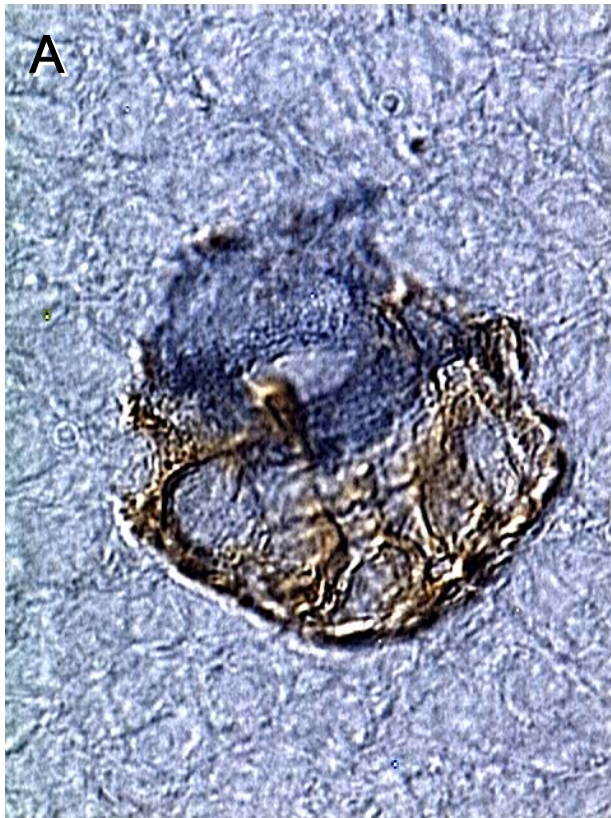

B

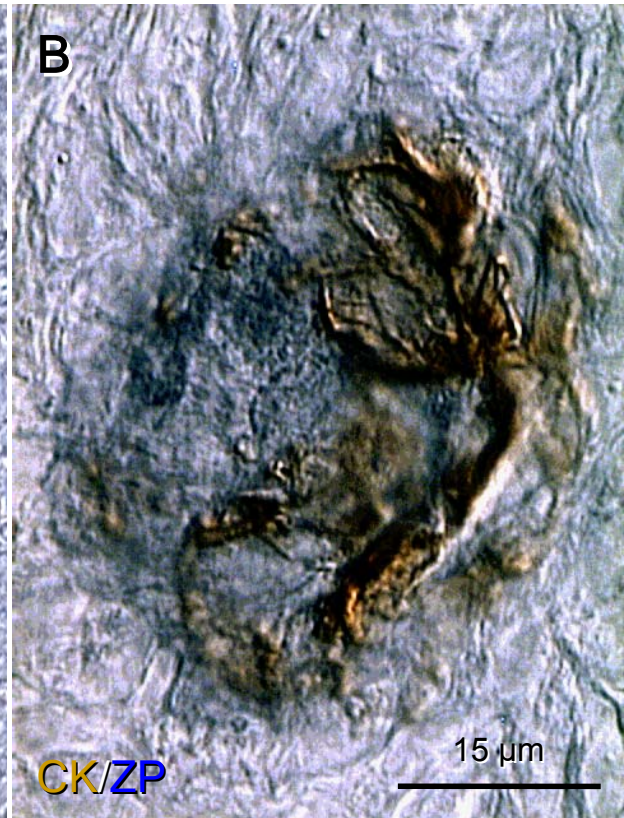

CK/ZP

15 μm

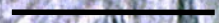

Supplement: MOESM6 [file 9567240]
